# Supplementary material for: Luminescent terbium(iii) complex-based titania sensing material for fluoride and its photocatalytic properties
Source: Royal Society of Chemistry journal article supplement (doi:10.1039/c2pp05380b), 2012-02-15
Supplement: c2pp05380b.pdf [file c2pp05380b.pdf]

***Supporting information for***

Luminescent terbium(III) complex-based titania sensing material for  
fluoride and its photocatalytic properties

Zhan Zhou, Qianming Wang<sup>\*</sup>, Shumin Huo, Yaqing Yang

*School of Chemistry and Environment, South China Normal University, Guangzhou 510006,*

*P. R. China*

\* To whom the correspondence should be addressed. E-mail: [qmwang@scnu.edu.cn](mailto:qmwang@scnu.edu.cn)  
Tel: 86-20-39310258; Fax: 86-20-39310187

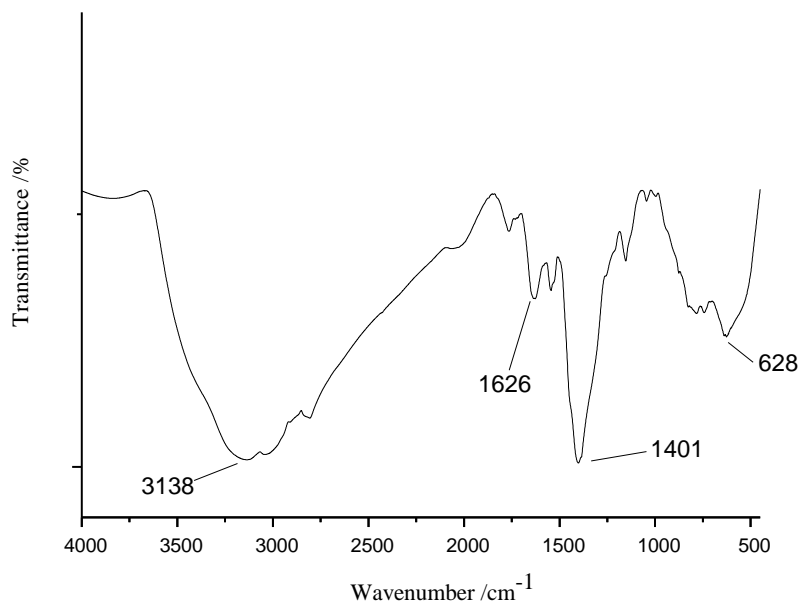

Figure S1 IR spectra of the hybrid material.

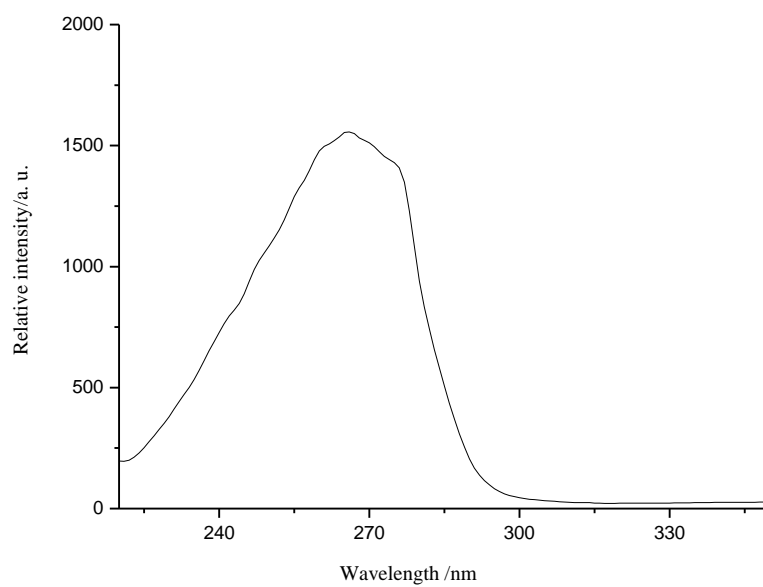

Figure S2 Excitation spectra of H<sub>a</sub> in water ( $\lambda_{em}=545$  nm).

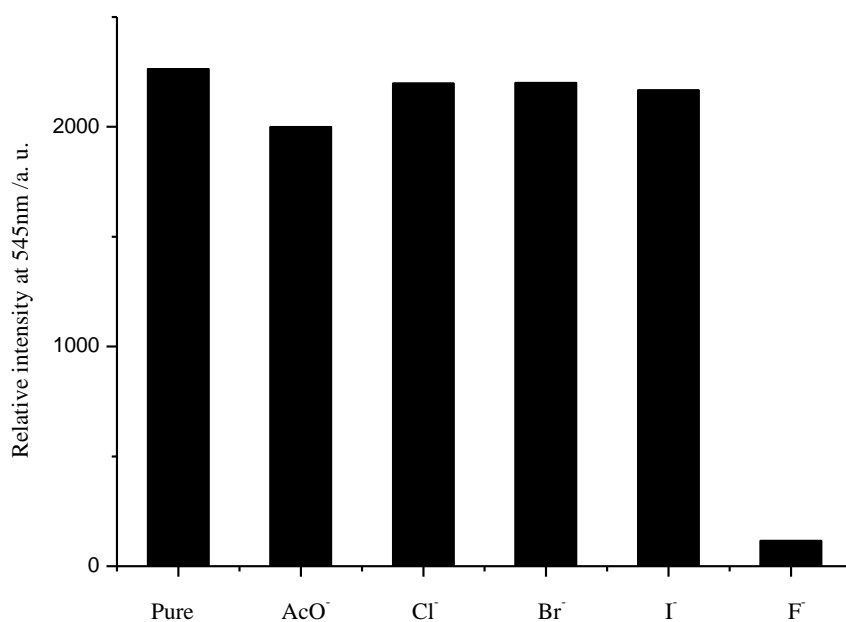

Figure S3 Plot of fluorescence intensity of H<sub>a</sub> in water upon addition of 10<sup>-3</sup> mol/L of [Bu<sub>4</sub>N] Cl, Br, I and CH<sub>3</sub>COO (monitored at the 545 nm).

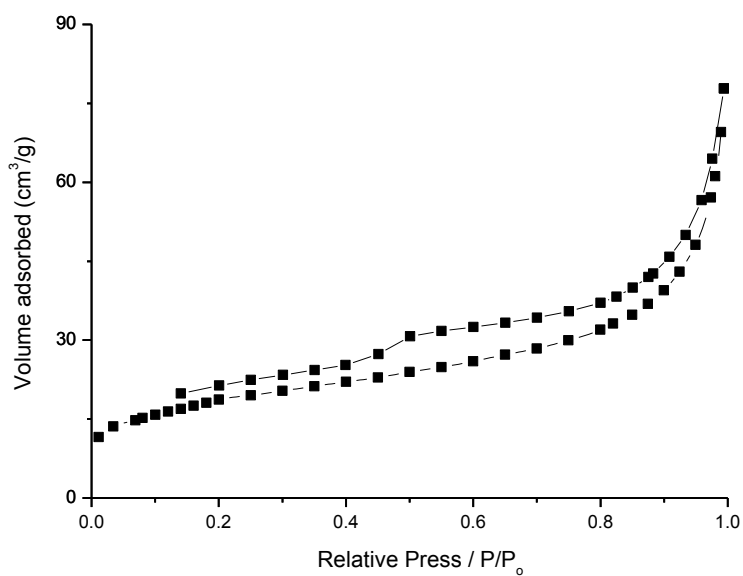

Figure S4 Nitrogen adsorption-desorption curves of the hybrid material.

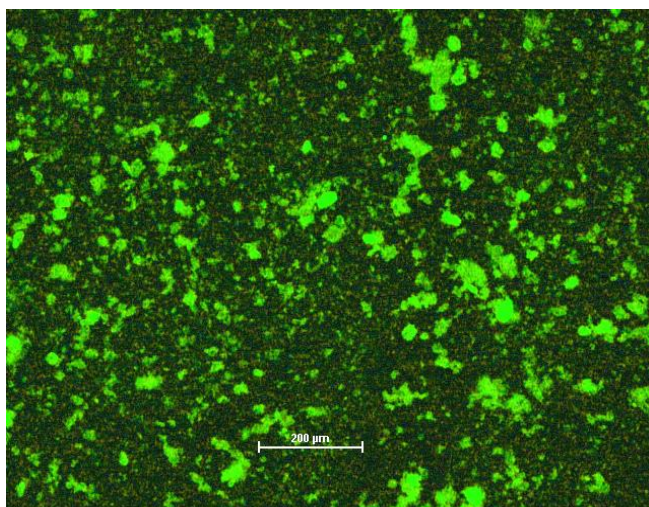

Figure S5 Fluorescence microscope of H<sub>a</sub>.
